# Supplementary material for: Relationship between the Cycle Threshold Value (Ct) of a Salmonella spp. qPCR Performed on Feces and Clinical Signs and Outcome in Horses
Source: MDPI journal article supplement (doi:10.3390/microorganisms11081950), 2023-07-30
Supplement: s1 [file s1]

**Supplementary Figure S1.** Correlation between the qPCR Ct value and the bacterial concentration (log CFU/ml), as determined for three *Salmonella* strains isolated from horse feces samples

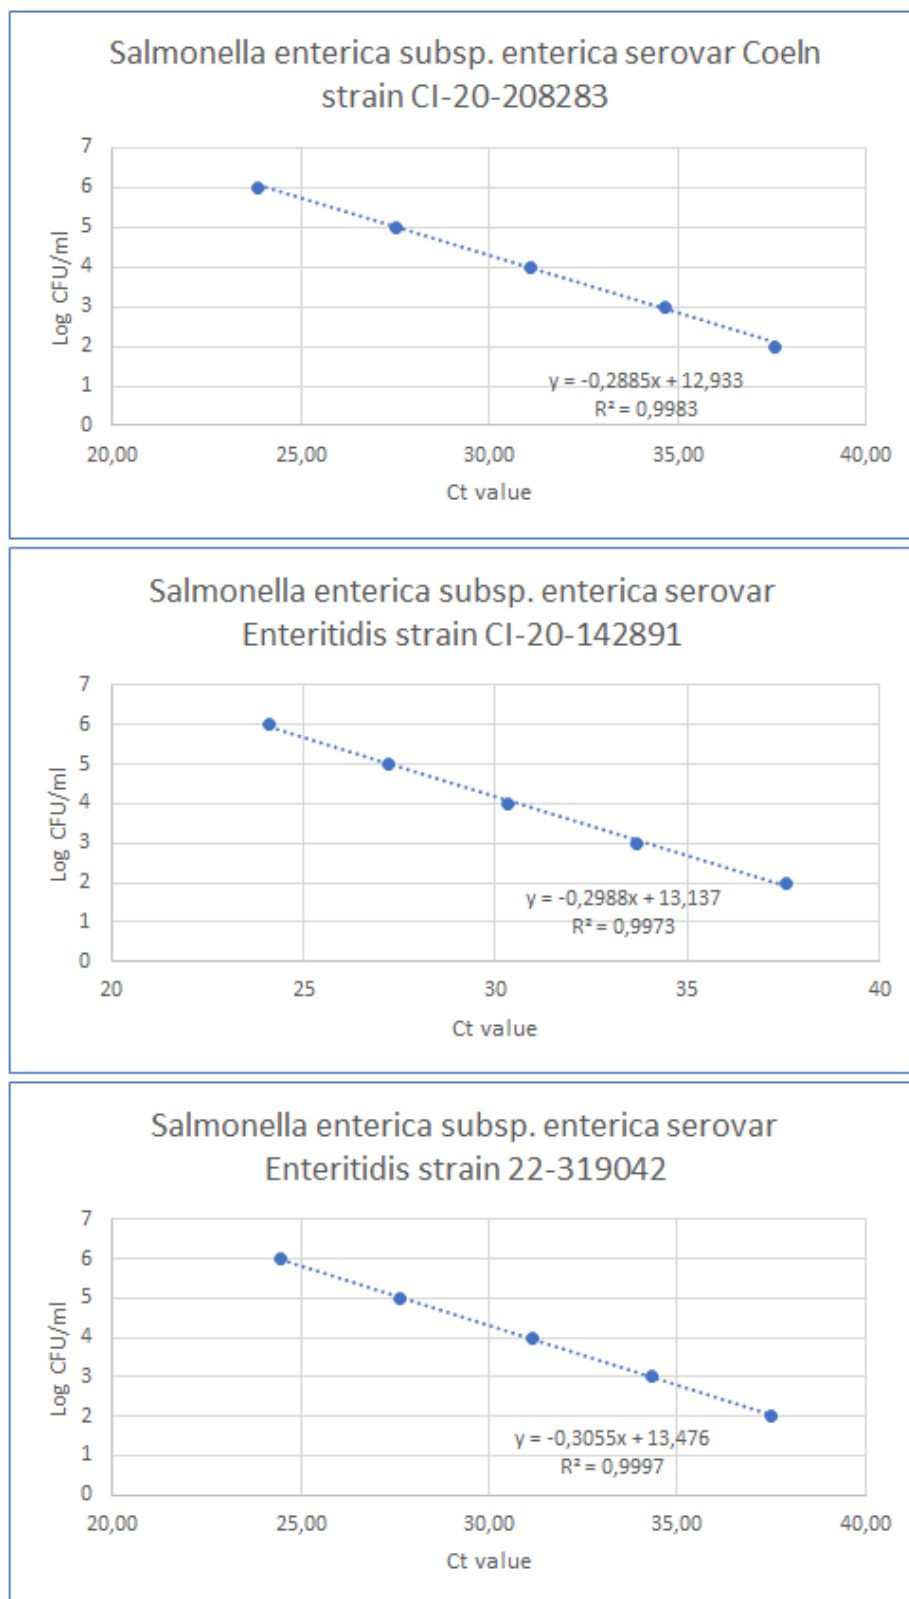

**Supplementary Table S1.** Comparison of the equation correlating the qPCR Ct value with the bacterial concentration (log CFU/ml), as determined for three *Salmonella* strains isolated from horse feces samples.

| Bacterial strain                            | Log CFU/ml for a Ct value (x) of 30 | CFU/ml for x=30 | % mean        | Slope | Efficiency |
|---------------------------------------------|-------------------------------------|-----------------|---------------|-------|------------|
| <i>S. enterica</i> Coeln CI-20-208283       | 4.28                                | 18967.06        | 104.7%        | -0.29 | 94.5%      |
| <i>S. enterica</i> Enteritidis CI-20-142891 | 4.17                                | 14893.61        | 82.2%         | -0.30 | 99.3%      |
| <i>S. enterica</i> Enteritidis 22-319042    | 4.31                                | 20464.45        | 113.0%        | -0.31 | 102.1%     |
| <b>Mean</b>                                 | <b>4.25</b>                         | <b>18108.37</b> | <b>100.0%</b> |       |            |
| <b>SD</b>                                   | <b>0.07</b>                         | <b>2882.98</b>  | <b>15.9%</b>  |       |            |
